# Supplementary material for: A phthalocyanine-grafted MA–VA framework polymer as a high performance anode material for lithium/sodium-ion batteries
Source: Royal Society of Chemistry journal article supplement (doi:10.1039/d1dt01400e), 2021-01-01
Supplement: d1dt01400e1.pdf [file d1dt01400e1.pdf]

## Supporting Information

# **Phthalocyanine-grafted MA-VA framework polymer as high performance anode material for lithium/sodium-ion batteries**

Jianjun Zhao<sup>[a]</sup>, Yong Xu<sup>[a]</sup>, Jun Chen<sup>\*[a]</sup>, Lihong Tao<sup>[a]</sup>, Caixia Ou<sup>[a]</sup>, Weixia Lv<sup>[a]</sup>, Shengwen  
Zhong<sup>\*[a]</sup>

<sup>[a]</sup> *School of Materials Science and Engineering, Jiangxi Key Laboratory of Power Batteries and Materials, Jiangxi University of Sciences and Technology, Ganzhou 341000. China.*

*E-mail: chenjun@jxust.edu.cn; zhongshw@126.com*

**Fig. S1.** The geometry optimization of MA-VA-PcNi with HyperChem.

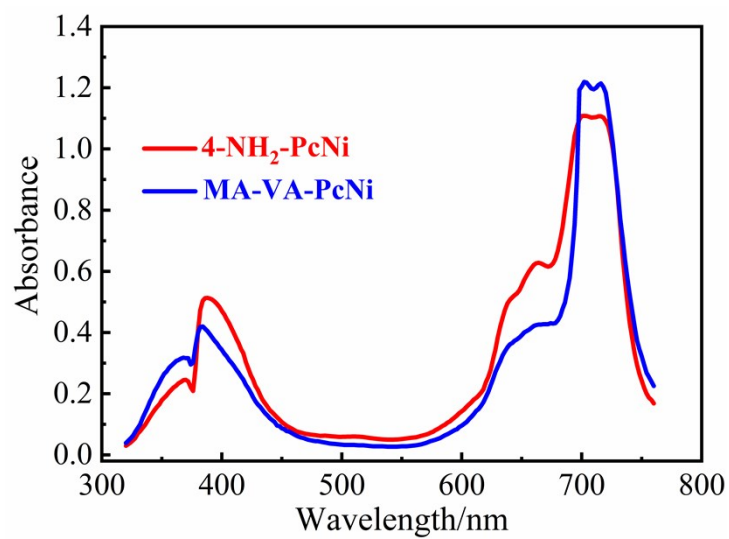

**Fig. S2.** UV-Vis spectra of 4-NH<sub>2</sub>-PcNi and MA-VA-PcNi in DMF ( $5 \times 10^{-5}$  M).

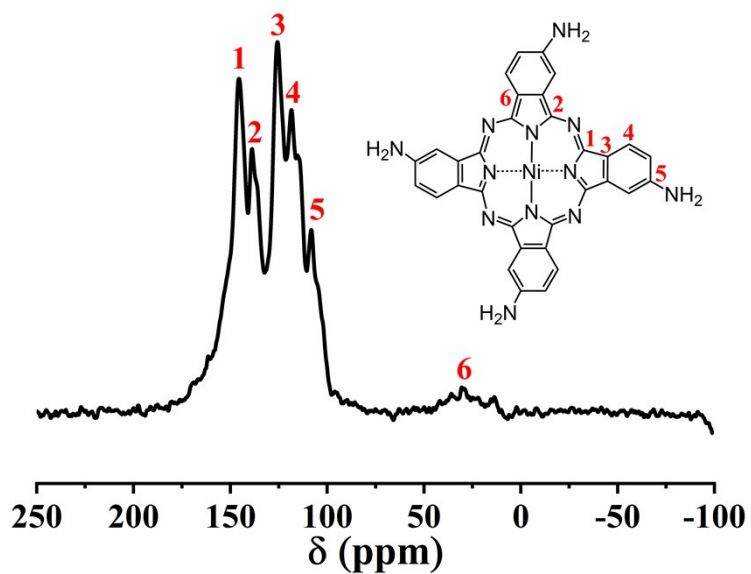

**Fig. S3.** <sup>13</sup>C solid-state CP-MAS NMR spectrum of 4-NH<sub>2</sub>-PcNi.

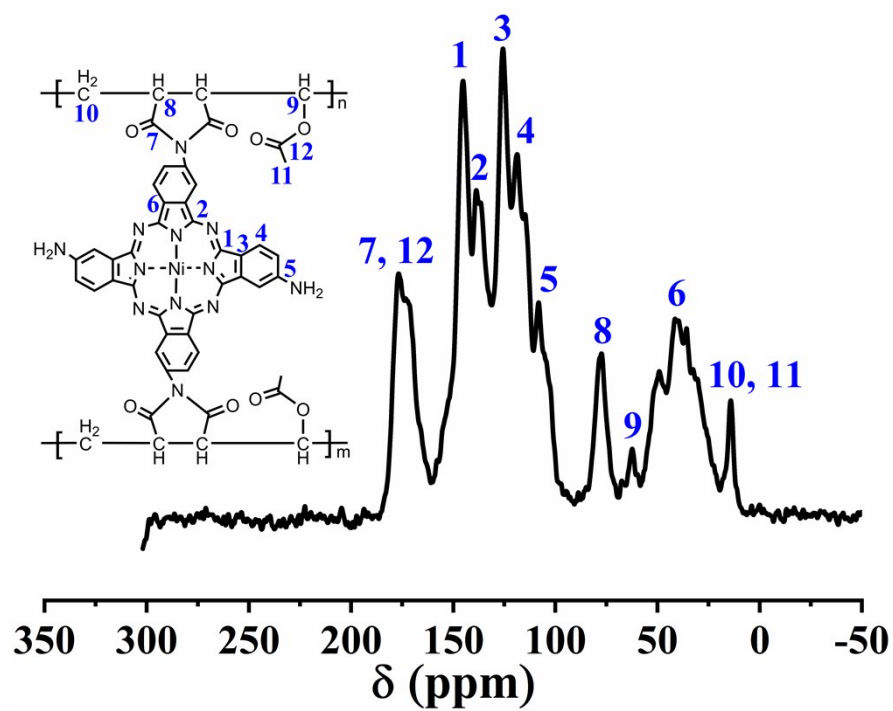

**Fig. S4.**  $^{13}\text{C}$  solid-state CP-MAS NMR spectrum of MA-VA-PcNi.

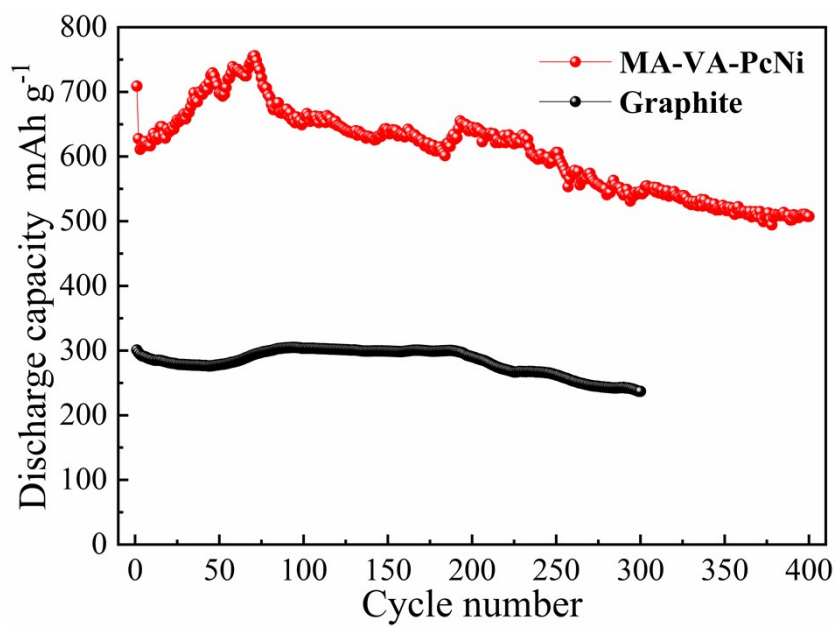

**Fig. S5.** Cycling performance of MA-VA-PcNi and graphite electrodes as an anode for lithium ion battery.

**Table S1.** Performance comparison of graphite and MA-VA-PcNi

| Materials  | Initial discharge capacity (mAh/g) | Reversible capacity (mAh/g) | ICE (Current density) | 1 st discharge capacity (mAh/g) | Capacity retention        |
|------------|------------------------------------|-----------------------------|-----------------------|---------------------------------|---------------------------|
| Graphite   | 330                                | 271                         | 82.3% (200 mA/g)      | 301                             | 78.74% (after 300 cycles) |
| MA-VA-PcNi | 1019                               | 718                         | 70.46% (200 mA/g)     | 610                             | 83.1% (after 400 cycles)  |

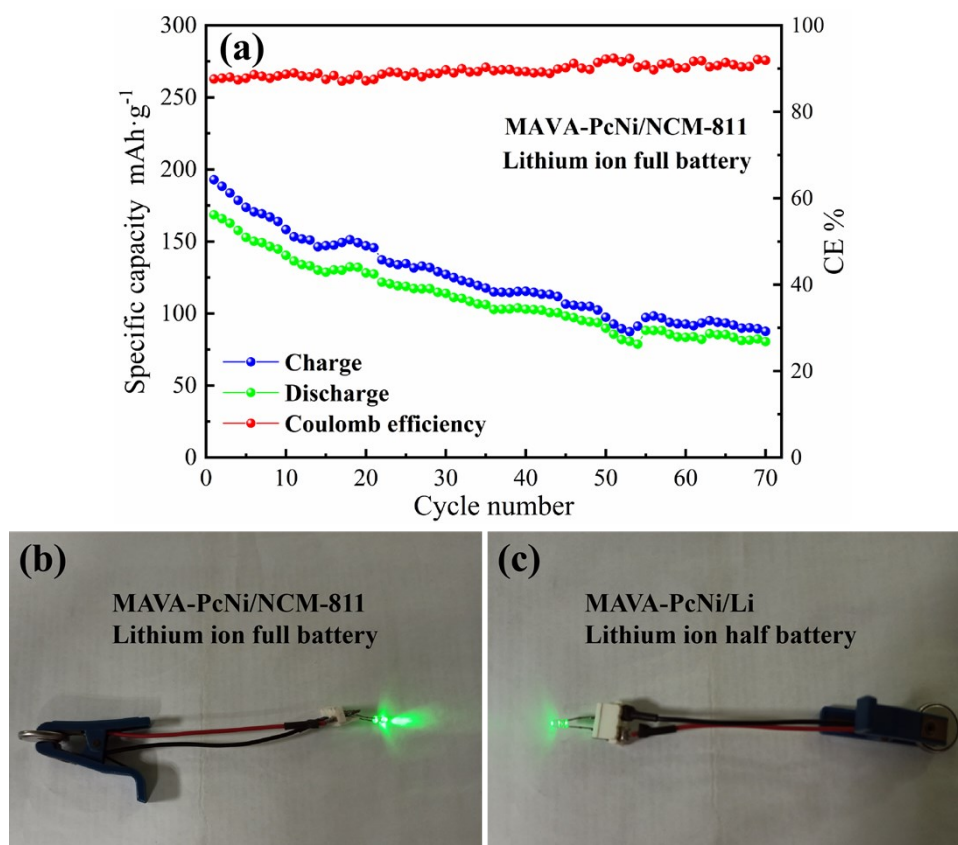

**Fig. S6.** (a) Cycle performance of MA-VA-PcNi/NCM-811 full battery (0.2 C);(b) and (c) photographs of LED lights powered by a MA-VA-PcNi/NCM-811 full battery and a MA-VA-PcNi/Li half battery.

**Table S2.** Performance comparison of LIBs and SIBs

| Batteries | Initial discharge capacity (mAh/g) | ICE (Current density) | 1 st discharge capacity (mAh/g) | Capacity retention       | Capacity (Current density) |
|-----------|------------------------------------|-----------------------|---------------------------------|--------------------------|----------------------------|
| LIBs      | 1019                               | 70.46% (200 mA/g)     | 610                             | 83.1% (after 400 cycles) | 195 (2 A/g)                |
| SIBs      | 694                                | 47.75% (100 mA/g)     | 336                             | 82.7% (after 400 cycles) | 164 (1 A/g)                |

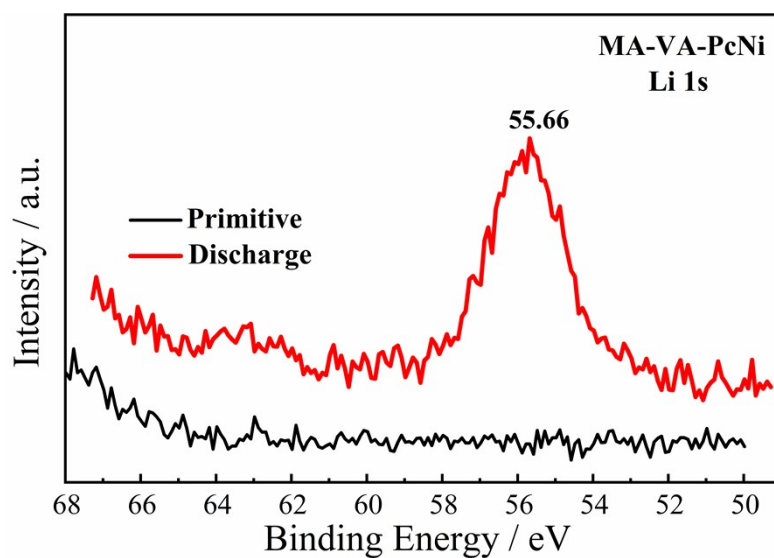**Fig. S7.** Li 1s XPS spectra of MA-VA-PcNi electrodes with primitive and discharged states for lithium ion battery.

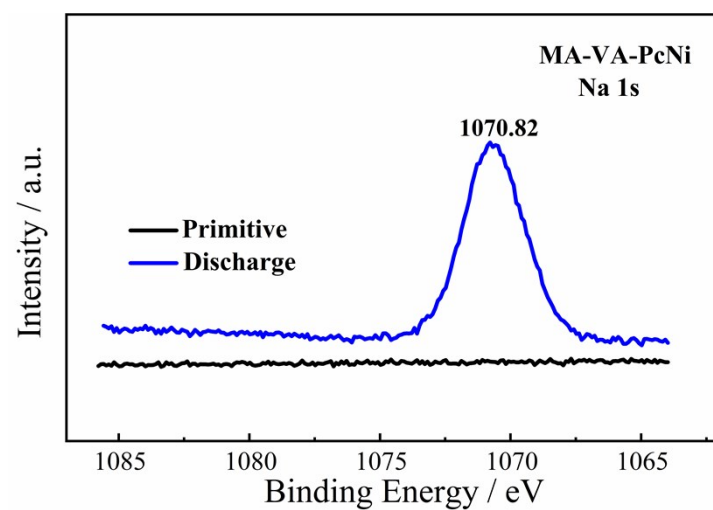

**Fig. S8.** Na 1s XPS spectra of MA-VA-PcNi electrodes with primitive and discharged states for sodium ion battery.
